# Supplementary material for: Risk stratification of adults with congenital heart disease during the COVID-19 pandemic: insights from a multinational survey among European experts
Source: PubMed Central journal article supplement — Open Heart. 2021 Apr 21;8(1):e001455. doi: 10.1136/openhrt-2020-001455 (PMC8061557; doi:10.1136/openhrt-2020-001455), 2021-04-21
Supplement: openhrt-2020-001455supp001.pdf [file openhrt-2020-001455supp001.pdf]

**Table 1. Questionnaire**

| Question                                                                                                                   | Answer                                                                                                                                                                                                                                                                                                                                                                   |
|----------------------------------------------------------------------------------------------------------------------------|--------------------------------------------------------------------------------------------------------------------------------------------------------------------------------------------------------------------------------------------------------------------------------------------------------------------------------------------------------------------------|
| 1. Please, indicate your name                                                                                              |                                                                                                                                                                                                                                                                                                                                                                          |
| 2. Do you consider all ACHD patients at risk for COVID-19 related complications                                            | - Yes<br>- No<br>- Unsure                                                                                                                                                                                                                                                                                                                                                |
| 3. How do you estimate COVID risk in your patients (multiple answers are possible)                                         | - based on national / working group consensus<br>- based on center specific agreement<br>- based on personal judgment<br>- I don't stratify ACHD patients into different COVID-19 risk categories<br>- I don't know                                                                                                                                                      |
| 4. What do you consider as general risk factor(s) for an adverse outcome in COVID-19 (multiple answers are possible)       | - diabetes<br>- advanced renal disease<br>- arterial hypertension<br>- male gender<br>- immunosuppression<br>- coronary artery disease<br>- symptomatic heart failure<br>- advanced liver disease<br>- advanced age<br>- advanced lung disease<br>- any other condition not mentioned before:                                                                            |
| 5. What do you consider as ACHD-specific risk factor(s) for an adverse outcome in COVID-19 (multiple answers are possible) | - pregnancy<br>- impaired subpulmonary ventricular function<br>- trisomy 21<br>- mechanical heart valve(s)<br>- cyanotic heart disease (SpO2 <90%)<br>- 22q11 microdeletion<br>- symptomatic arrhythmia<br>- pulmonary arterial hypertension<br>- systemic right ventricle (per se)<br>- Fontan physiology<br>- impaired subaortic ventricular function<br>- ICD carrier |

|                                                                                                                                                                 |                                                                                                                                                                            |                                            |
|-----------------------------------------------------------------------------------------------------------------------------------------------------------------|----------------------------------------------------------------------------------------------------------------------------------------------------------------------------|--------------------------------------------|
|                                                                                                                                                                 | - moderate or severe valvular heart disease                                                                                                                                | - any other condition not mentioned before |
| 6. What do you consider as most important risk factor for an adverse outcome in COVID-19 (please rate the following options from 1 to 4, with 1=most important) | - complexity of heart defect                                                                                                                                               |                                            |
|                                                                                                                                                                 | - age                                                                                                                                                                      |                                            |
|                                                                                                                                                                 | - gender                                                                                                                                                                   |                                            |
|                                                                                                                                                                 | - co-morbidities                                                                                                                                                           |                                            |
| 7. Do you consider this patient at risk for COVID-19 related complications? Please rate from 0% (no risk) to 100% (very high risk)                              | 25-year-old male Fontan patient with an extracardiac TCPC-conduit and good hemodynamics, no arrhythmia.                                                                    |                                            |
| 8. Do you consider this patient at risk for COVID-19 related complications? Please rate from 0% (no risk) to 100% (very high risk)                              | 35-year-old male with repaired coarctation of the aorta, a mildly stenotic bicuspid aortic valve and persistent proximal hypertension, well controlled with ACE-inhibitors |                                            |
| 9. Do you consider this patient at risk for COVID-19 related complications? Please rate from 0% (no risk) to 100% (very high risk)                              | 35-year-old female with Ebstein anomaly with mild to moderate tricuspid valve regurgitation and patent foramen ovale                                                       |                                            |
| 10. Do you consider this patient at risk for COVID-19 related complications? Please rate from 0% (no risk) to 100% (very high risk)                             | 40-year-old male with repaired Tetralogy of Fallot, a mildly stenotic RV-PA conduit and a right ventricle with a RV-EDVi of 110 ml/m <sup>2</sup> and an RV-EF of 38%.     |                                            |
| 11. Do you consider this patient at risk for COVID-19 related complications? Please rate from 0% (no risk) to 100% (very high risk)                             | 25-year old male with patch closure of a ventricular septal defect and left-ventricular non-compaction with an LV-EF of 50%.                                               |                                            |

12. Do you consider this patient at risk for COVID-19 related complications? 45-year-old male with repaired Tetralogy of Fallot and moderate to severe pulmonary regurgitation, a right ventricle with a RV-EDVi of 140 ml/m<sup>2</sup> and an RV-EF of 49%. Please rate from 0% (no risk) to 100% (very high risk)

13. Do you consider this patient at risk for COVID-19 related complications? 45-year-old female with trisomy 21 and Eisenmenger physiology due to a non-restrictive ventricular septal defect (SpO<sub>2</sub> 78%) and preserved biventricular function. Please rate from 0% (no risk) to 100% (very high risk)

ACE means angiotensin-converting-enzyme; ACHD, congenital heart disease; COVID-19, coronavirus disease 2019; ICD, implantable cardioverter defibrillator; SpO<sub>2</sub>, peripheral capillary oxygen saturation; LV-EF, left ventricle ejection fraction; TCPC, total cavopulmonary connection; RV-EDVi, right ventricle end-diastolic volume index; RV-EF, right ventricle ejection fraction and RV-PA, right ventricle to pulmonary artery.

No pre-defined cut-offs were applied when defining advanced age and advanced renal / liver disease
